# Supplementary material for: Integrating genomic and epidemiologic data to accelerate progress toward schistosomiasis elimination
Source: eLife. 2022 Aug 30;11:e79320. doi: 10.7554/eLife.79320 (PMC9427098; doi:10.7554/eLife.79320)
Supplement: Supplementary file 1. [file elife-79320-supp1.xlsx]

## Sheet: study list
First author	PubYr	Ref	Pathogen	Question(s)	q_category	Question category	Data generation	Data generation category	Data analysis	Scale	Scale category	DOI
Aeemero	2015		S. mansoni	What is the genetic diversity and population structure of S. mansoni in four endemic areas of Ethiopia?	Genetic diversity Population structure	Population structure	Genotyping via 11 microsatellite markers, derived from DNA extracted from eggs in stool	Microsatellites	Allele frequencies Linkage disequilibrium Inbreeding coefficient and fixation index Isolation by distance Principal components analysis	Samples derived from "four geographically distant S. mansoni endemic areas"	Continental	﻿10.1186/s12863-015-0297-6
Barbosa	2018		S. mansoni	How do genetic differentiation and effective population size vary for S. mansoni populations when resampling different sample sizes of infrapopulations from human infections?	Genetic differentiation Effective population size Sampling	Population structure	Genotyping via 11 microsatellite markers, derived from DNA extracted from eggs in stool	Microsatellites	Genetic differentiation via Jost's D Variance effective population size	Two sites in Bahia State, Brazil 12 km apart and connected by a river and a highway	Local	﻿10.1016/j.ijpara.2018.10.001
Barbosa	2016		S. mansoni	What factors are associated with persistent transmission of S. mansoni in two rural communities in Brazil?	Determinants of persistence	Transmission persistence	Genotyping via 11 microsatellite markers	Microsatellites	Allele frequencies Genetic differentiation via Jost's D Effective allele number Effective population size	Two rural villages located 6 km apart by road on the Jiquirica River in Bahia State, Brazil	Local	﻿10.1016/j.ijpara.2016.01.007
Berger	2021	32	S. mansoni	Does the genetic structure of S. mansoni change with repeated praziquantel treatment? Is there evidence of selection that could explain reduced efficacy of long-term MDA programs?	Population structure Effective population size	Treatment resistance	Whole genome sequencing	Whole genome sequencing	Kinship coefficients via KING Population structure/principal components analysis via PLINK Nucleotide diversity, fixation index and aboslute divergence in PIXY	Five villages in two districts in Uganda	Local	﻿https://doi.org/10.1038/s41467-021-24958-0
Blanton	2011	46	S. mansoni	Are persistent infections with S. mansoni (i.e., post-treatment excretion of eggs) drawn from the same population as susceptible parasites?	Determinants of persistence	Treatment resistance	Genotyping via 15 microsatellite markers	Microsatellites	Genetic differentiation via Jost's D	Two sites in Bahia State, Brazil 12 km apart and connected by a river and a highway	Local	﻿10.1016/j.ijpara.2011.06.002
Boon	2019		S. haematobium S. bovis	Is there a reproductive barrier between S. haematobium and S. bovis?	Existence of hybridization	Hybridization	Amplfiication of 17 mircosatellite loci Digestion of ITS rDNA	Microsatellites ITS rDNA	Restriction length polymorphism to distinguish schistosome species Principal components analysis on allele frequencies/parasite to visualize admixing between S. haematobium & S. bovis Discriminant analysis of principal components Correlation of genetic distances (Nei's pairwise Fst) with geographic distance	10 rural villages in northern Senegal (along the Senegal River), with samples from more distant sites (SE Senegal and Mali) for comparison	Regional	﻿https://doi.org/10.1016/j.ijpara.2019.08.004
Boon	2018	59	S. haematobium S. bovis Sh x Sb hybrids	How are S. haematobium x S. bovis hybrids distributed over time and space in the Senegal River Basin?	Distribution of hybridization	Hybridization	Partial cox1 mtDNA ITS rDNA	rDNA/mtDNA markers	Compare frequency of hybrids per village Principal component analysis Correlation between frequency of hybrids per village and S. haematobium and S. mansoni prevalence	Ten villages in the Delta and Middle Valleys of the Senegal River, Lampsar River and Lac de Guiers	Local	﻿10.1017/S0031182018000525
Catalano	2020	84	S. mansoni	What host species do S. mansoni isolates use in northern Senegal and how are they related evolutionarily? Is there potential for spillover of S. mansoni infection from rodents to huamsn?	Host species identification	Host species	ITS of nuculear rDNA Mitochondrial 12S rRNA gene cox1 and cox3 mtDNA genes	rDNA/mtDNA markers	Phylogenetic analysis via maximum likelihood	9 sites near Lac de Guiers in northern Senegal	Local	﻿https://doi.org/10.3201/eid2606.200107
Catalano	2018	58	S. mansoni	Do small mammals play a role as zoonotic reservoir of schistosome species/hybrids on the Senegal River?	Host species identification	Host species	DNA extracted from both adult schistosomes (from dissected liver/intestine of sacrificed animals) and miracidia and sequenced for complete ITS region on rDNA and segement of cox1 gene on mtDNA	rDNA/mtDNA markers	Pearson's Chi-squared test for differences in the occurrrence of Schistosoma spp. infection among host species	9 sites in the Senegal River basin spaced at least 3 km apart (reflective of rodent home ranges) and considered as independent replicates	Local	﻿https://doi.org/10.1016/j.ijpara.2019.08.004
Chevalier	2014	30	S. mansoni	What genes are associated with oxamniquine resistance in S. mansoni?	Identification of resistance genes	Treatment resistance	Methods demonstration of exome capture and extreme QTL to identify genes associated with specific traits	Exome capture	Differences in allele frequencies of each variant between treated and untreated worm pools	Lab study in mice	Lab study	﻿10.1186/1471-2164-15-617
Crellen	2016	31	S. mansoni S. rodhaini	When did the lineages of S. mansoni and S. rodhaini diverge? Population demographics since then? Differences in selection?	Evolutionary origins and population demographics	Lineage origins/diversification	Whole genome resequencing from schisto collection at Natural History Museum	Whole genome sequencing	Phylogenetic tree via maximum likelihood Principal components analysis Coalescence modeling (PSMC) to infer time to most recent common ancestor and effective population sizes, analysis of genes undergoing selection	Samples from across Sm-endemic areas (East Africa, West Africa, Caribbean)	Continental	﻿10.1038/srep20954
Ding	2017		S. japonicum	Is there a reduction in parasite population size after several years of integrated control efforts? What is the effective population size in local parasite populations? What is the extent of individual parasite relationships?	Effect of treatment/control Effective population size	Treatment resistance	Genotyping via 7 microsatellite loci derived from field-collected cercariae	Microsatellites	Genetic diversity: number of observed and effective alleles per locus, observed and expected heterozygosity, unbiased expected heterozygosity, fixation index, deviations from Hardy-Weinberg, linkage disequilibrium Genetic structure: most likely number of genetic clusters, admixture model, genetic distances between parasites in each village, principal components analyisis Tests for bottleneck even…	Two sites in Anhui province on north bank of the Yangtze River	Local	﻿10.1007/s00436-016-5321-x
Faust	2019		S. mansoni	How do repeated praziquantel treatemtns affect the population of S. mansoni parasites over short (less than one month) and medium (six months) time periods post-treatment?	Effect of treatment/control	Treatment resistance	Genotyping via 7 microsatellite loci	Microsatellites	Genetic diversity (departure from Hardy-Weinberg, observed and expected heterozygosity, allelic richness) Linear mixed models to identify correlates of parasite genetic diversity Nei's distance to construct trees of infrapopulations over time Identify sibling pairs between miracidia within infrapopulations pre- and post-treatment Population structure quantified using analysis of molecular varianc…	Three primary schools in Mayuge distrct, Uganda on Lake Albert	Local	﻿https://doi.org/10.1186/s13071-019-3860-6
French	2013		S. mansoni	How many people and parasites per person need to be sampled to identify and quantify changes in the genetic diversity of parasite populations? How does the analysis of infrapopulation versus componenet population influence the interpretation of standard measures of genetic diversity (Ho, He, AR)?	Genetic diversity Sampling	Population structure	Genotyping via 7 microsatellite loci	Microsatellites	Allelic richness and observed/expected heterozygosity between baseline and follow up across randomly selected hosts from whom the number of miracidia sampled varied from 1 to 20	Two schools on Lake Victoria in Kenya	Local	﻿10.1016/j.actatropica.2012.03.001
Gower	2013		S. mansoni S. haematobium	What is the population genetic structure of S. mansoni and S. haematobium across the African continent?	Population structure	Population structure	Seven microsatellite loci (for S. mansoni) Eight microsatellite loci (for S. haematobium)	Microsatellites	Diversity of infection: allele sizes, alleles per locus, major allele frequency, expected and observed heterozygosity, inbreeding coefficient Population structure: Cavalli-Sforza and Edwards' chord distances, Wright's Fst, analysis of molecular variance, correlation between genetic and geographic distance matrices Effective number of breeders: MLNe, LDNe	African continent Sm: Two schools in Kenya, two in Tanzania, one in Uganda, two in Niger and one in Mali Sh: two schools in Kenya, two in Tanzania, one in Cameroon, three in Niger and two in Mali	Continental	﻿10.1016/j.actatropica.2012.09.014
Gower	2017	42	S. mansoni	What are the phenotypic and genotypic characteristics of the S. mansoni population after five years of school-based treatment with praziquantel through the National Schistosomiasis Control Program in Tanzania?	Effect of treatment/control	Treatment resistance	Genotyping via 7 microsatellite loci following same procedures as Norton et al 2010	Microsatellites	Allele sizes Parentage analysis/sibship reconstruction Observed and expected heterozygosity and allelic richness Genetic distance: Cavlli-Sforza and Edwards chord distances, neighbor-joining clustering, hierarchcial Wrights Fst	Two schools near Lake Victoria in Tanzania	Local	﻿10.1186/s13071-017-2533-6
Huyse	2018		S. mansoni	Does parasite genetic variation contribute to disease phenotype in humans?	Morbidity/worm burden	Schistosomiasis phenotypes	Genotyping via 9 microsatellites	Microsatellites	Allele frequencies per host at each locus Redundancy analysis to correlate allele frequencies with host characteristics	Three villages in northern Senegal co-endemic for Sh and Sm	Local	﻿https://doi.org/10.1016/j.ijpara.2017.07.010
Huyse	2009	89	S. haematobium S. bovis Sh x Sb hybrids	Do S. haematobium and S. bovis hybridize in a field setting in northern Senegal?	Existence of hybridization	Hybridization	cox1 mtDNA ITS 1+2 rRNA	rDNA/mtDNA markers	Identification of mixed ITS sequences (double chromatogram peaks at polymorphic positions between Sh and Sb)	Six villages in the Senegal River Basin, separated by 10-150 miles	Local	﻿10.1371/journal.ppat.1000571
Kebede	2020	85	S. mansoni	How does the genetic diversity and population structure of S. mansoni compare for isolates from humans vs non-human primates in Ethiopia?	Genetic diversity Population structure Host species identification	Population structure Host species	Genotyping via 14 microsatelllites	Microsatellites	Genetic diversity: expected heterozygosity, allelic richness and inbreeding coefficient, likely number of breeding males/females within an infrapopulation Genetic structure: Fst, factorial correspondence analysis	Three Sm-endemic sites in Oromia Regional State, Ethiopia (160-350 km from Addis Ababa)	Local	﻿https://doi.org/10.1371/journal.pntd.0008538
Kincaid-Smith	2021	34	S. haematobium S. bovis	What is the source of schistosomiasis emergence in Europe?	Source of emergence	Lineage origins/diversification	Whole genome sequencing	Whole genome sequencing	Updated genome assembly by adding new PacBio long read data for S. bovis to improve this genome and more accurately quantify patterns of hybridization between S. bovis and S. haematobium. Tentatively identified hybrid Eurpoean samples based on genomic reads from these mapping to both S. bovis and S. haematobium genomes.	Single European isolate of Sh x Sb hybrid maintained via laboratory passage. Pure S. haematobium and S. bovis isolates also maintained via laboratory passage.	Continental	﻿https://doi.org/10.1371/journal.pntd.0010062
Landeryou	2022		S. haematobium S. bovis S. guineensis Sh x Sg hybrids Sh x Sb hybrids	Are there genome-wide patterns of selection within the S. haematobium group? Do outlier loci provide evidnece of differentation between species in the region? Does introgression play a role in the dominance of S. haematobium over S. guineensis in areas where they overlap?		Lineage origins/diversification Hybridization	RADseq from adult worms generated from one round of laboratory passgae after collection in the field	Reduced representation	Species identification via phylogenetic analysis of unlinked SNP loci Population differentiation using admixture model, correlated allele frequencies and principal coordinate analysis Hybrid index from Bayesian estimation of genomic clines that identified loci that defined admixture expectation Global outlier loci analysis using loci with a minor allele frequency of 0.05	Samples derived from 5 West African countries (Mali, Senegal, Niger, Sao Tome and Cameroon)	Regional	﻿10.1371/JOURNAL.PNTD.0010088
Leger	2020		S. haematobium S. bovis Sh x Sb hybrids	What is the prevalence of S. haematobium, S. bovis and Sh x Sb hybrids in humans, livestock and snails in northern Senegal?	Distribution of hybridization	Hybridization	Amplication of partial fragment of cox1 (mtDNA) and complete ITS (rDNA)	rDNA/mtDNA markers	Hybrid 1: S. bovis cox1 profile + S. haematobium ITS profile (repeated backcrossing of hybrid with S. haematobium) Hybrid 2: either S. bovis or S. haematobium cox1 profile + both S. haematobium and S. bovis parental nuclear ITS copies (F1 Sh x Sb hybrid) Prevalence estimates in Bayesian framework allow for diagnostic uncertainty	14 villages in an area of perennial transmission; 13 villages in an area of seasonal transmission	Local	﻿10.1016/S2542-5196(20)30129-7
Lelo	2014		S. mansoni	Does worm burden and genetic diversity of S. mansoni infections in a high-transmision area of Kenya change with regular yearly school-based treatment with praziquantel?	Morbidity/worm burden Genetic diversity Effect of treatment/control	Schistosomiasis phenotypes	Genotyping via 12 microsatellite loci	Microsatellites	Infrapopulation: number of full sibling families, effective number of breeders, allelic richness, expected heterozygosity Component population: differences in gene diversity and allelic richness between baseline and endline	Four schools in Mwea, central Kenya, located no more than 8 km apart	Local	﻿10.1371/journal.pntd.0003221
Long	2022		S. mansoni	Do S. mansoni parasites form genetic clusters that coincide with the communities of their human hosts?		Population structure	Genotyping via 14 microsatelllites	Microsatellites	Nei's hierarchical gene differentiation statistics K-mean cluster analysis Neighbor-joining tree Principal coordinates of genetic distance	Three communities in the Bahia State, Brazil, one urban neighborhood in Salvador and two rural communities 200 km southwest of Salvador	Regional	﻿10.1038/s41598-022-04776-0
Lu	2010	71	S. japonicum	What is the extent of gene flow between miracidia from mammals and cercariae from snails?	Gene flow Host species identification	Host species	Six microsatellite markers	Microsatellites	Pairwise genetic distance between miraicid and cercariae Sibship reconstruction	Three marshland and three hilly villages in Anhui province, China	Local	﻿https://dx.plos.org/10.1371/journal.pntd.0000781
Mouahid	2019	86	S. mansoni	How do six life history traits (prepatent period, infection rate, cercarial production, shell diameter, fecundity and survival) vary for the diurnal and nocturnal shedding chronotypes of S. mansoni?		Worm life history	PCR amplification of cox1 gene	mtDNA markers	Phylogenetic analysis via maximum likelihood	Parasite samples originally collected in Dhofar, Oman (n = 10 diurnal, n = 14 nocturnal) + two samples of nocturnal S. rodhaini from Burundi	Continental	﻿10.1111/tmi.13227
Neves	2019		S. mansoni	How does the number of unique parental genotypes of schistosomes in an individual relate to the underlying true (female) worm burden?	Morbidity/worm burden	Schistosomiasis phenotypes	Microsatellites	Microsatellites	Sibship reconstruction	Reanalysis of longitudinal data from two schools 18 km apart near Lake Victoria in Tanzania.	Local	﻿10.1186/s13071-019-3687-1
Nikolakis	2021	24	S. japonicum	What is the genetic structure and patterns of relatedness within and among hosts in two villages in Sichuan, China?		Population structure	Whole genome sequencing	Whole genome sequencing	Rare allele sharing Posterior probabilities of sibship and other degrees of relatedness	Two villages, located 12 km apart in Sichuan Province, China	Local	﻿https://dx.plos.org/10.1371/journal.pntd.0009020
Norton	2010	47	S. mansoni	What is the impact of an initial round of MDA on the population genetic structure of S. mansoni?	Effect of treatment/control Population structure	Treatment resistance	Genotyping via 7 microsatellite loci	Microsatellites	Allele sizes. Differences beteween observed and expected heterozygosity, allelic richness Genetic distance: Cavalli-Sforza and Edwards' chord distances visualized on a neighbor-joining tree Fst between schools within years and between years within schools	Two schools near Lake Victoria in Tanzania	Local	﻿10.4269/ajtmh.2010.10-0283
Pennance	2020		S. haematobium	What schistosome species are transmitted by specific Bulinus species in the Niamey region of Niger?	Host species identification	Host species	Previously developed panel of microsatellite loci cox1 mtDNA to distinguish Sb and Sh based on size of amplicon ITS 1+2 rDNA identified species-specific SNPs Additional species-specific SNPs from 18S rDNA	Microsatellites mtDNA/rDNA	Principal components analysis	16 villages 60 km north and 40 km south of Niamey along the Niger River	Local	﻿https://doi.org/10.1186/s13071-020-04136-9
Platt	2019	93	S. haematobium	Is hybridization ancient or ongoing? Is there evidence for introgression? If so, do introgressed alleles show signs of selection?	Evolutionary history Existence of hybridization	Hybridization	Exome capture + whole genome sequencing	Exome capture Whole genome sequencing	Mitochondrial haplotype assignment Inbreeding coefficient and fixation index Principal components analysis of unlinked SNPs Levels of admixture Selection quantification: allele frequency differences and cross-population extended haplotype homozygosity score Generations since admixture Structure and expression of invadolysin locus	Archived samples from Zanzibar and Niger	Continental	﻿10.1093/molbev/msz154
Rey	2021	34	S. haematobium S. bovis	What is the genomic diversity within S. haematobium and S. bovis? What is the genetic differentiation between these two species at the genome scale over the African continent? Do pure S. haematobium lineages persist in Africa?	Genetic diversity Genetic differentiation Existence of hybridization	Lineage origins/diversification	Whole genome sequencing and the identification of 56,181 SNPs	Whole genome sequencing	Principal components analysis to determine global structure of genetic variation Observed heterozygositc (compared to the mean with Mann-Whitney test) Average pairwise nucleotide differences within each cluster Pairwise nucleotide differences at each site compared between S. bovis and S. haematobium Tajima's D for each species Pairwise Nei's genetic distance between each isolate in each species	Samples derived from "a wide range of East and West African countries" (14 countries total plus Spain and Corsica)	Continental	﻿https://dx.plos.org/10.1371/journal.ppat.1009313
Rudge	2008	75	S. japonicum	Which host species are involved in transmission of S. japonicum in the Philippines?	Host species identification	Host species	Genotyping via 7 microsatellite markers	Microsatellites	Number of alleles, gene diversity, polymorphism information content Genetic diversity: allelic richness, observed and expected heterozygosity Genetic structure: Wright's hierarchical F-statistics, analysis of molecular variance, Inbreeding coefficient & fixation index Phylogenetic reconstruction via neighbor-joining	50 villages in Samar Province, Phillippines where human and animal infections were clustered	Local	﻿10.1371/journal.pntd.0000340
Rudge	2009	43	S. japonicum	Are S. japonicum populations differentiated by habitat type (hill vs marshland)?	Genetic differentiation	Population structure	Genotyping via 7 microsatellite markers	Microsatellites	Number of alleles, gene diversity, allelic richness, inbreeding coefficients Genetic differentiation: Wright's hierarchical F-statistics, analysis of molecular variance Phylogenetic reconstruction via neighbor-joining	Anhui Province, China: 3 villages in a hilly county + 3 villages in a marshland county	Local	﻿10.1111/j.1365-294X.2009.04181.x
Sady	2015		S. mansoni S. haematobium	What is variation in the cox1 mtDNA marker among human schistosomes in Yemen?	Genetic diversity	Population structure	Partial fragment of cox1 mitochondrial gene	mtDNA markers	Phylogenetic analysis using nieghbor joining, mnimum evolution and maximum parsimony methods. Nucleotide divergence Tests of selection (McDonald-Kreitman) and neutrality (Tajima's)	20 villages in five endemic provinces in western Yemen	Local	﻿10.1186/s13071-015-1168-8
Savassi	2020	92	S. haematobium S. bovis Sh x Sb hybrids	What is the relationship between S. bovis in cattle and S. haematobium in an area where cattle and humans share the same water source?	Existence of hybridization	Hybridization	Partial cox1 mtDNA ITS 1+2 rDNA	rDNA/mtDNA markers	Phylogenetic analysis of partial cox1 mtDNA using maximum likelihood	A single village on the Oueme River in southern Benin	Local	﻿https://doi.org/10.1007/s00436-020-06709-0
Shortt	2021	53	S. japonicum	Are infections acquired from local or regional sources? What is the relatedness of infections over time, following praziquantel treatment?		Population structure	ddRADseq	Reduced representation	Principal components analysis Phylogenetic analysis using neighbor joining Rare allele sharing	12 villages in Sichuan Province, China	Local	﻿10.1101/2020.04.30.070656
Shrivastava	2005	39	S. japonicum	Do different S. japonicum genotypes circulate within and between different provinces in China?		Population structure	Genotyping via 11 microsatellite markers	Microsatellites	Observed vs expected heterozygosity Analysis of molecular variance Wright's F statistics	Seven provinces in China	Regional	﻿10.1111/j.1365-294X.2005.02443.x
Steinauer	2008		S. mansoni S. rodhaini	Do S. mansoni and S. rodhaini co-occur spatially? Are hybrids common in snails? Are snails co-infected? How do the patterns of cercarial emergence compare?		Hybridization	Seven microsatellite loci 1S and 12S genes of mtDNA	Microsatellites mtDNA	Pearson's correlation Analysis of covariance Chi-square test Fisher's exact test	22 sites on Lake Victoria in Western Kenya	Local	﻿https://dx.plos.org/10.1371/journal.pntd.0000222
Steinauer	2013		S. mansoni	Are sampling choices likely to influence population genetic studies of schistosomes when sampling progeny (miracidia) rather than adult worms?	Sampling	Population structure	Genotyping via 12 microsatellite loci	Microsatellites	Sibship reconstruction Estimates of infrapopulation size: 1. Full sib familes / n 2. Linkage disequilibrium (LDNE) 3. Sibship assignment	Lake Victoria, Kisumu, Kenya	Local	﻿https://dx.plos.org/10.1371/journal.pntd.0002456
Steinauer	2009		S. mansoni	Do S. mansoni populations in the Lake Victoria basin in Kenya function as a single panmictic population or subpopulations occupying separate transmission foci?	Population structure	Population structure	Genotyping via 20 microsatellite markers	Microsatellites	HWE and disequilibrium Diversity: number of alleles, allelic richness, Nei's unbiased heterozygosity, Inbreeding coefficient Structure: F-statistics, patterns of relatedness, Baeysian clustering analysis, fixation index, pairwise Fst	8 sites in western Kenya on the shore of Lake Victoria	Local	﻿10.1016/j.ijpara.2009.04.010
Van den Broeck	2015	107	S. mansoni	Was the S. mansoni population that arose after dam construction on the Senegal River founded by a small number of strains or multiple introductions from multiple source populations?	<Source of emergence> Evolutionary origins	Lineage origins/diversification	Genotyping via 9 microsatellites + sequences from mitochondrial cox1 gene	Microsatellites mtDNA	Haplotype networks based on statistical parsimony based on cox1 haplotypes Genetic diversity quantified via observed and expected heterozygosity, allelic richness, inbreeding coefficient Clustering analysis Factorial correspondence analysis to visualize genotypic similarities/differences among parasites Pairwise genetic differentation	Samples from 9 sites in northwest Senegal (the area of interest) + samples from 2 sites in southeast Senegal, 3 sites in southwest Mali well as sites in Cameroon, coastal Kenya, Niger, Nigeria, Uganda, Tanzania and Zambia.	Continental	﻿10.1371/journal.pntd.0003998
Vianney	2022		S. mansoni	Does the genetic structure of S. mansoni change with repeated praziquantel treatment? Are there signals of selection across the S. mansoni genome? If so, do they differ by history of treatment?		Treatment resistance	Whole genome sequencing	Whole genome sequencing	Fst test for genetic differentiation Effective population size from nucleotide diversity Rare allele sharing and kinship analysis Test for positive selection using cross-population extended haplotype homozygosity test	Samples from 8 fishing communities on islands in Lake Victoria, Uganda, located 1-13 km apart. Outgroups on shoreline and inland approximately 100 km away.	Local	﻿10.1101/2022.01.25.477652
Wang	2006	40	S. japonicum	Do different S. japonicum genotypes circulate within and between different host species in mainland China?	Host species identification Gene flow	Host species	Genotyping via 11 microsatellites, though only a single locus amplified per miracidium	Microsatellites	Clustering analysis Analysis of molecular variance Pairwise genetic differentiation Matrices of genetic distances were used to construct phylograms	Five villages in Anhui Province, China	Local	﻿10.1016/j.ijpara.2006.06.011
Webster	2012		S. haematobium	What is the genetic diversity of historical S. haematobium samples collected from across Africa?	Genetic diversity	Population structure	cox1 + nad1 mtDNA	mtDNA markers	Phylogenetic analysis using nieghbor joining, mnimum evolution and maximum parsimony methods. Haplotype and nucleotide diversity Tests for selection (McDonald-Kreitman) and neutrality (Tajima's)	41 sites across 18 countries	Continental	﻿10.1371/journal.pntd.0001882
Webster	2013		S. mansoni	What is the genetic variation of S. mansoni populations acorss the African continent?	Genetic diversity Population structure	Population structure	cox1 mtDNA ITS 1+2 rDNA	rDNA/mtDNA markers	Phylogenetic analysis of cox1 haplotypes using neighbor-joining, maximum parsimony and minimum evolution methods Haplotype diversity, nucleotide diversity Tests for selection (McDonald Kreitman) and neutrality (Tajima's)	Samples from 20 sites across 7 countries	Continental	﻿http://dx.doi.org/10.1016/j.actatropica.2012.08.009
Webster	2013	90	S. haematobium	How much genetic variation exsts among S. haematobium parasites on Zanzibar before and after control activities?	Genetic diversity Effect of treatment/control	Treatment resistance	cox1 + nad1 mtDNA ITS 1+2 rDNA	rDNA/mtDNA markers	Phylogenetic analysis using nieghbor joining, mnimum evolution and maximum parsimony methods.	Unguja Island, Zanzibar	Local	﻿http://dx.doi.org/10.1016/j.actatropica.2012.06.002
