# Supplementary material for: Integrating genomic and epidemiologic data to accelerate progress toward schistosomiasis elimination
Source: eLife. 2022 Aug 30;11:e79320. doi: 10.7554/eLife.79320 (PMC9427098; doi:10.7554/eLife.79320)
Supplement: Supplementary file 2. [file elife-79320-supp2.xlsx]

## Sheet: with refs (2)
Supplementary File 2. References of 47 studies of schistosomiasis epidemiology employing molecular methods by data generation method, study question and study scale
	Microsatellite				mtDNA/rDNA				RADseq/Exome/WGS
Study question	LAB	LOC	REG	CON	LAB	LOC	REG	CON	LAB	LOC	REG	CON
Population structure		Barbosa et al 2018 French et al 2013 Kebede et al 2020 Rudge et al 2009 Steinauer et al 2013 Steinauer et al 2009	Shrivastava et al 2005 Long et al 2022	Aeemero et al 2015 Gower et al 2013		Sady et al 2015		Webster et al 2013a Webster et al 2012		Nikolakis et al 2021 Shortt et al 2021
Hybridization		Steinauer et al 2008	Boon et al 2019			Boon et al 2018 Huyse et al 2009 Leger et al 2020 Savassi et al 2020 Steinauer et al 2008	Boon et al 2019					Platt et al 2019
Drug resistance		Blanton et al 2011 Ding et al 2017 Faust et al 2019 Gower et al 2017 Norton et al 2010				Webster et al 2013b			Chevalier et al 2014	Berger et al 2021 Vianney et al 2022
Host species identification		Kebede et al 2020 Lu et al 2010 Pennance et al 2020 Rudge et al 2008 Wang et al 2006				Catalano et al 2020 Catalano et al 2018 Pennance et al 2020
Lineage origins/diversification				Van den Broeck et al 2015				Van den Broeck et al 2015			Landeryou et al 2022	Crellen et al 2016 Kincaid-Smith et al 2021 Rey et al 2021
Morbidity/phenotype		Huyse et al 2018 Lelo et al 2014 Neves et al 2019
Transmission persistence		Barbosa et al 2016
Worm natural history								Mouahid et al 2019
Study scale abbreviations: LAB = laboratory study; LOC = local scale (tens of km; neighboring villages); REG = regional scale (hundreds of km; neighboring countries); CON = continental scale (thousands of km; non-neighboring countries). Categories informed by those used by Rey et al (2021). A list of all studies included in this table are provided in Supplementary File 1.
